# Supplementary material for: Circular RNA CircCCNB1 sponges micro RNA-449a to inhibit cellular senescence by targeting CCNE2
Source: publisher site journal article supplement (doi:10.18632/aging.102449), 2019-11-25
Supplement: Supplementary file [file aging-v11i22-102449-supplementary-material-SD1.pdf]

## SUPPLEMENTARY FIGURES

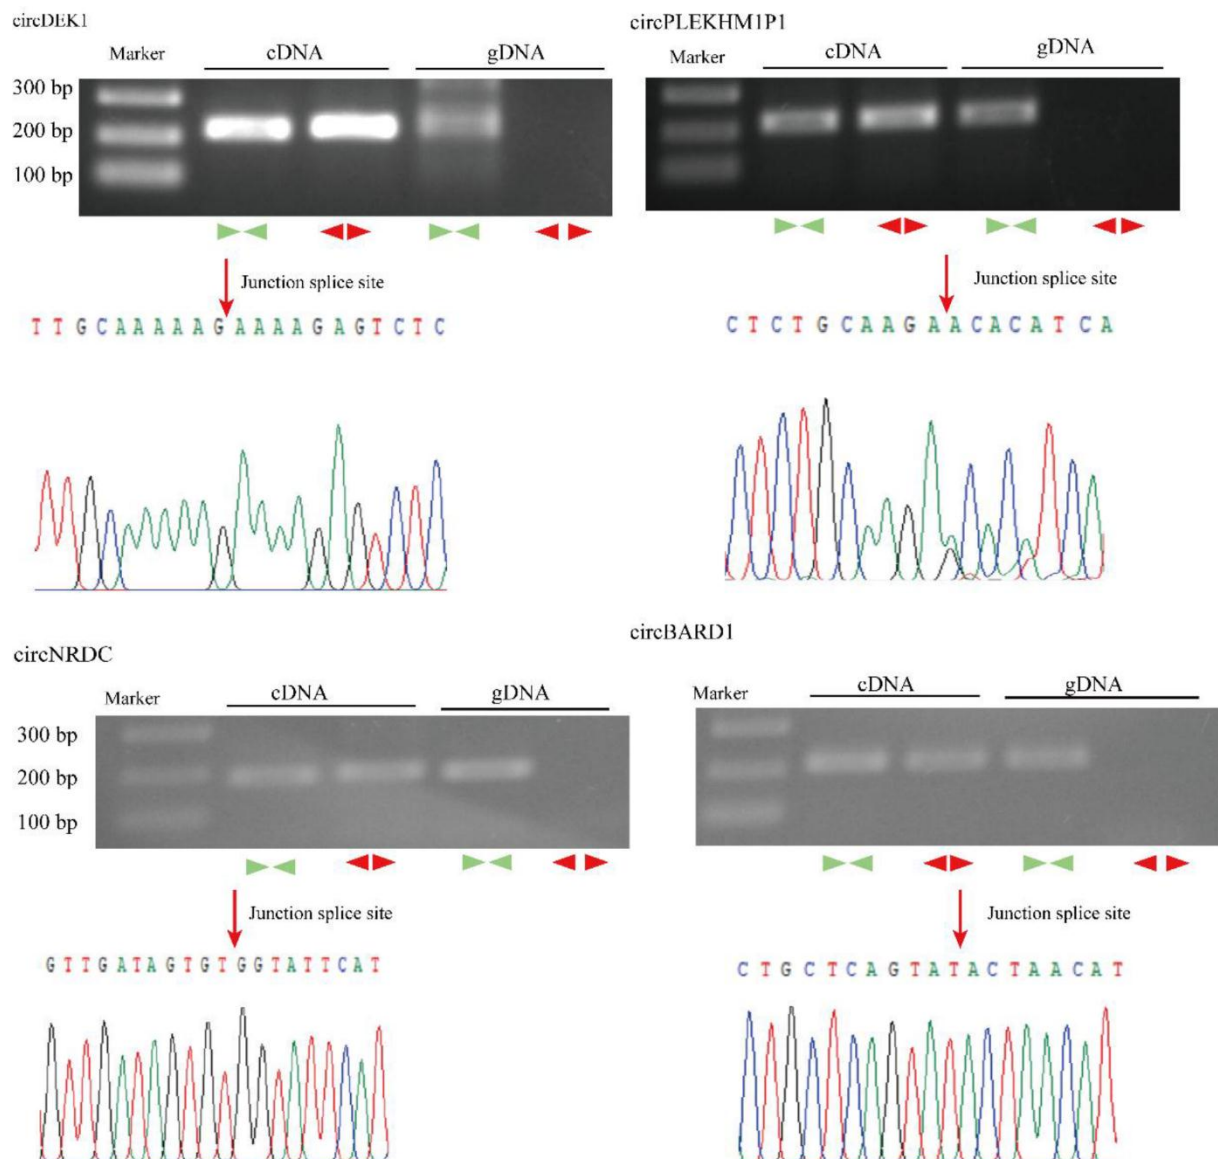

**Supplementary Figure 1. Validation of four novel Circular RNAs from the 10 mostly increased and decreased CircRNAs by RT-PCR Sanger sequencing.** Upper panel: RT-PCR products amplified using Convergent (blue) and divergent (red) primers under corresponding template; Lower panel: showing the back-spliced events of CircRNAs by Sanger sequencing.

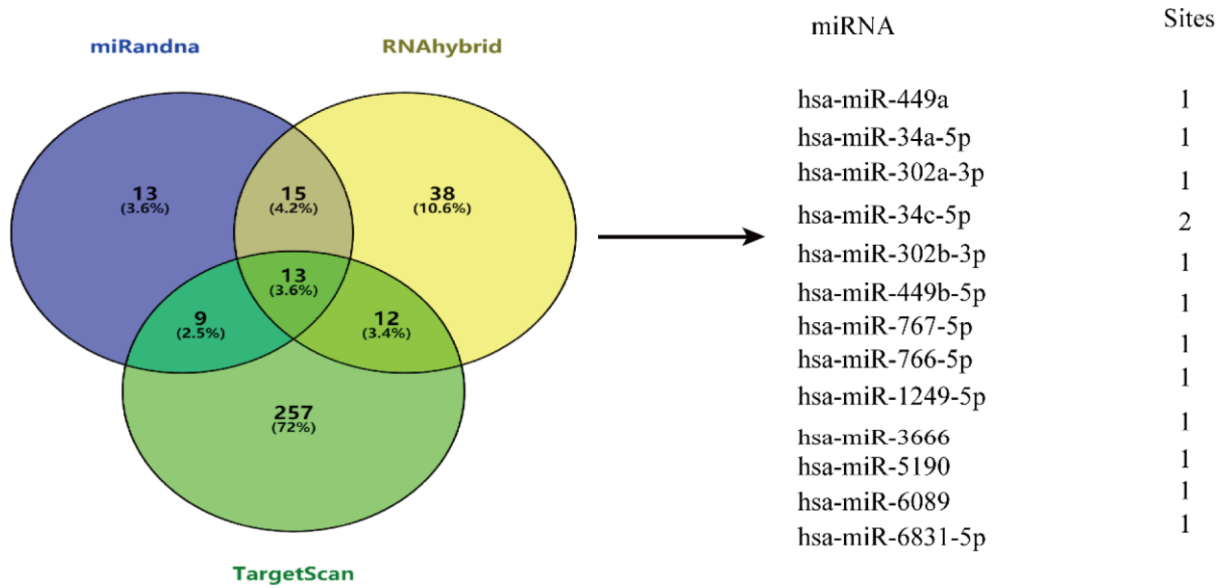

**Supplementary Figure 2. Predicted miRNAs binding to CircCCNB1.** The intersection of TargetScan, miRanda and RNAhybrid showed that CircCCNB1 acted as a sponge for 13 miRNAs. Among these, miR-449a were the top predicted miRNA targets of CircCCNB1.

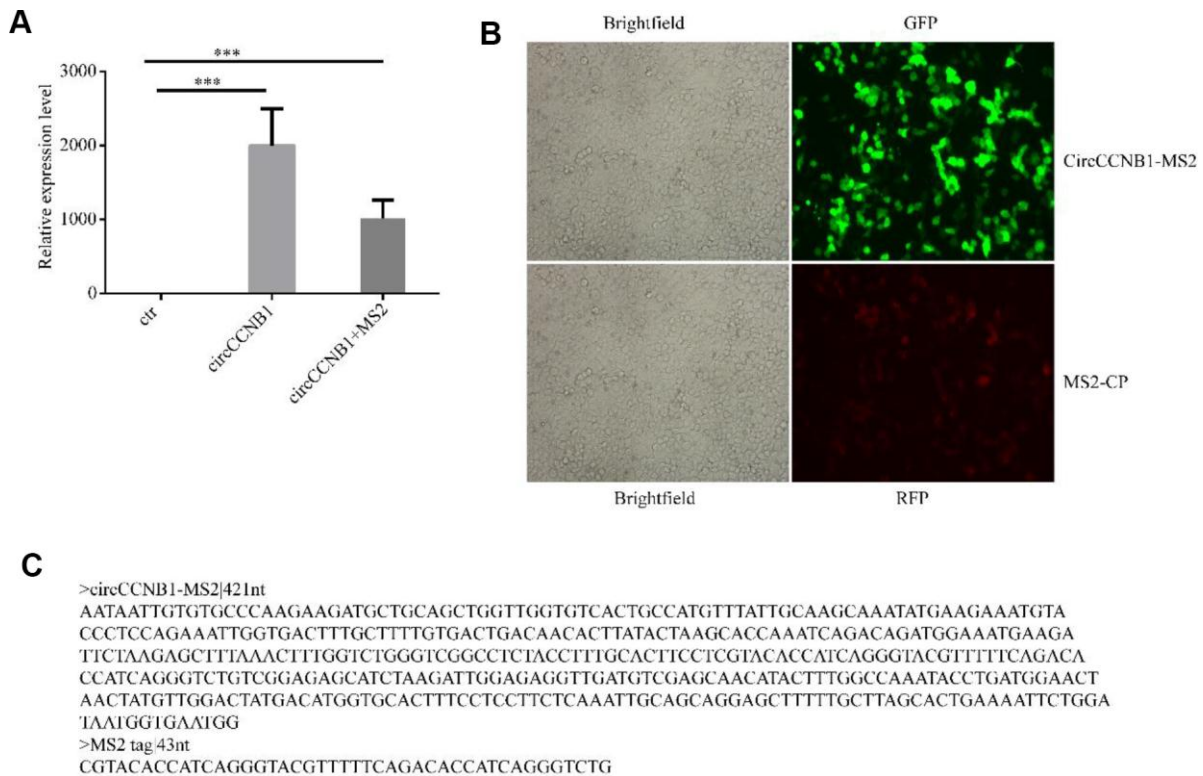

**Supplementary Figure 3. Validating the expression efficacy of CircCCNB1-MS2 and MS2-CP in HEK293T.** (A) Relative expression level in HEK293T cells after transfected with ctr, CircCCNB1, CircCCNB1-MS2, respectively, \*\*\* $P < 0.001$ . (B) expression efficacy of CircCCNB1-MS2 and MS2-CP in HEK293T cells (magnification,  $\times 10$ ). (C) Sequence of CircCCNB1-MS2 and MS2.
